# Supplementary material
Source: PubMed Central journal article supplement (PMC7956241)
Supplement: NIHMS1646408-supplement-Sup_Table1.pdf [file NIHMS1646408-supplement-Sup_Table1.pdf]

# Supplementary Table 1

## Mouse Occludin

F: CCTCCAATGGCAAAGTGAAT

R: CTCCCCACCTGTCGTGTAGT

## Mouse ZO-1

F: GCCAGAGAAAAGTTGGCAAG

R: TTGGATACTACTGCGCATAA

## Mouse Claudin-2

F: TTAGCCCTGACCGAGAAAGA

R: AAAGGACCTCTCTGGTGCTG

## Mouse E-cadherin

F: CAGCCTTCTTTTCGGAAGACT

R: GGTAGACAGCTCCCTATGACTG

## Mouse IL-1 $\beta$

F: GCAACTGTTCTGAACTCAACT

R: ATCTTTTGGGGTCCGTCAACT

## Mouse IFN- $\gamma$

F: ATGAACGCTACACACTGCATC

R: CCATCCTTTTGCCAGTTCCTC

## Mouse CXCL1

F: AAAGATGCTAAAAGGTGTCCCA

R: AATTGTATAGTGTGTCAGAAGCCA

## Mouse TNF- $\alpha$

F: TACTGAACTTCGGGGTGATTGGTCC

R: CAGCCTTGTCCTTGAAGAGAACC

## Mouse GAPDH

F: TGTGTCCGTCGTGGATCTGA

R: CCTGCTTACCACCTCTTGAT
