# Supplementary material
Source: PubMed Central journal article supplement (PMC7956241)

# Supplementary Figure 1

**A**

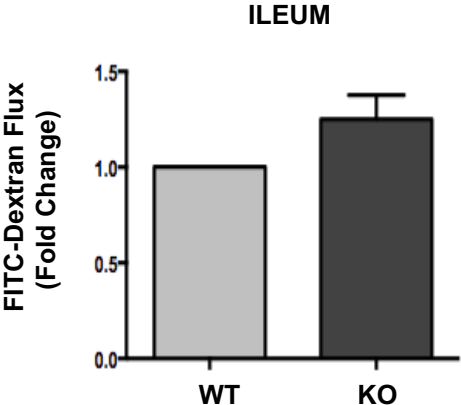

**B**

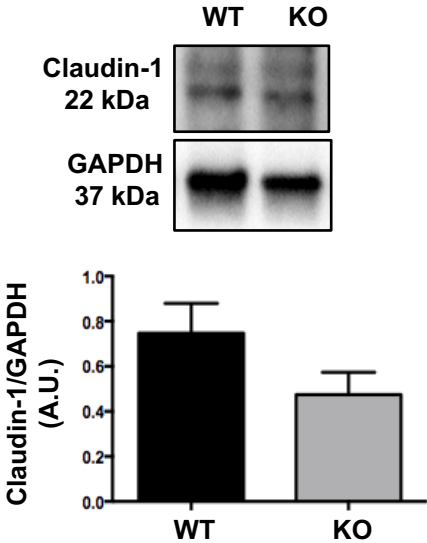

**C**

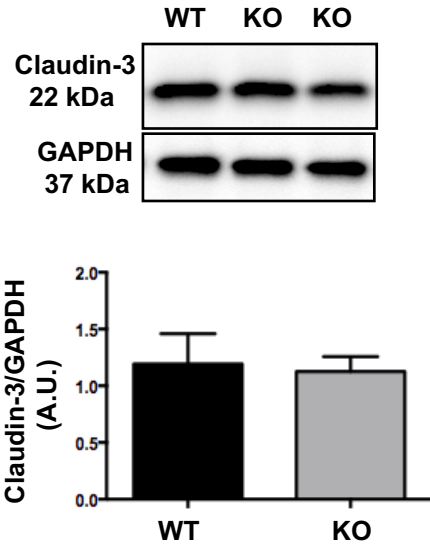

Supplement: NIHMS1646408-supplement-Sup_Fig1.pdf [file NIHMS1646408-supplement-Sup_Fig1.pdf]

# Supplementary Figure 2

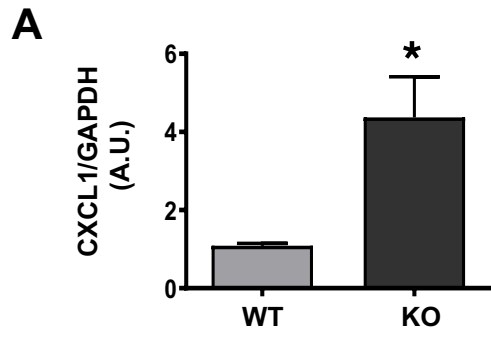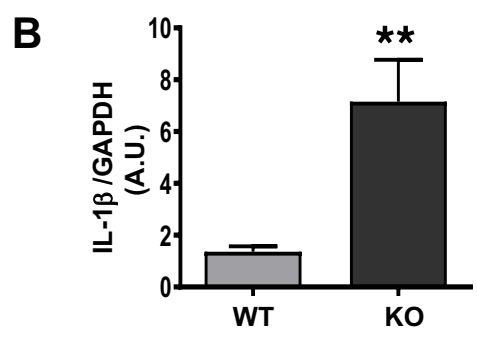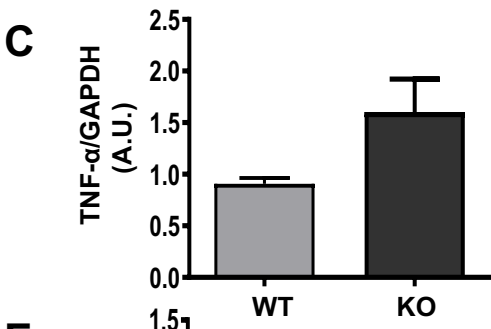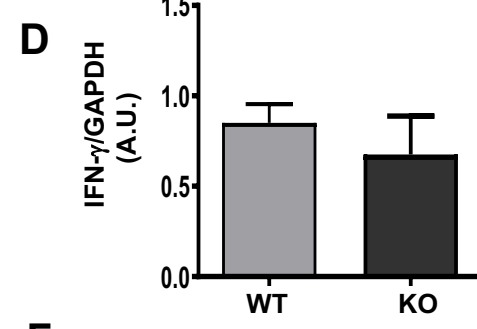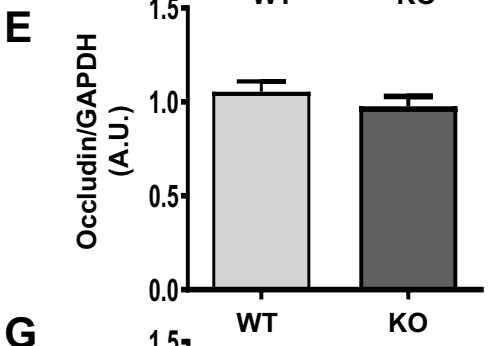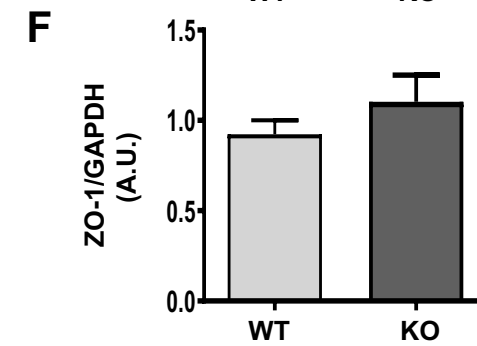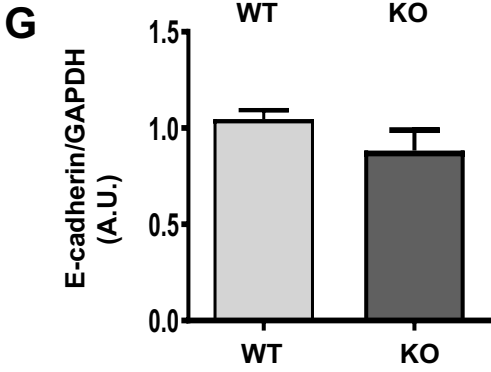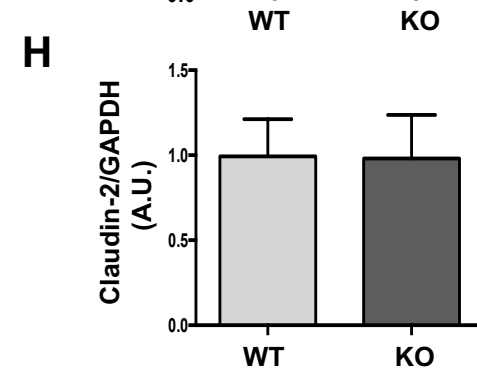

Supplement: NIHMS1646408-supplement-Sup_Fig2.pdf [file NIHMS1646408-supplement-Sup_Fig2.pdf]

# Supplementary Figure 3

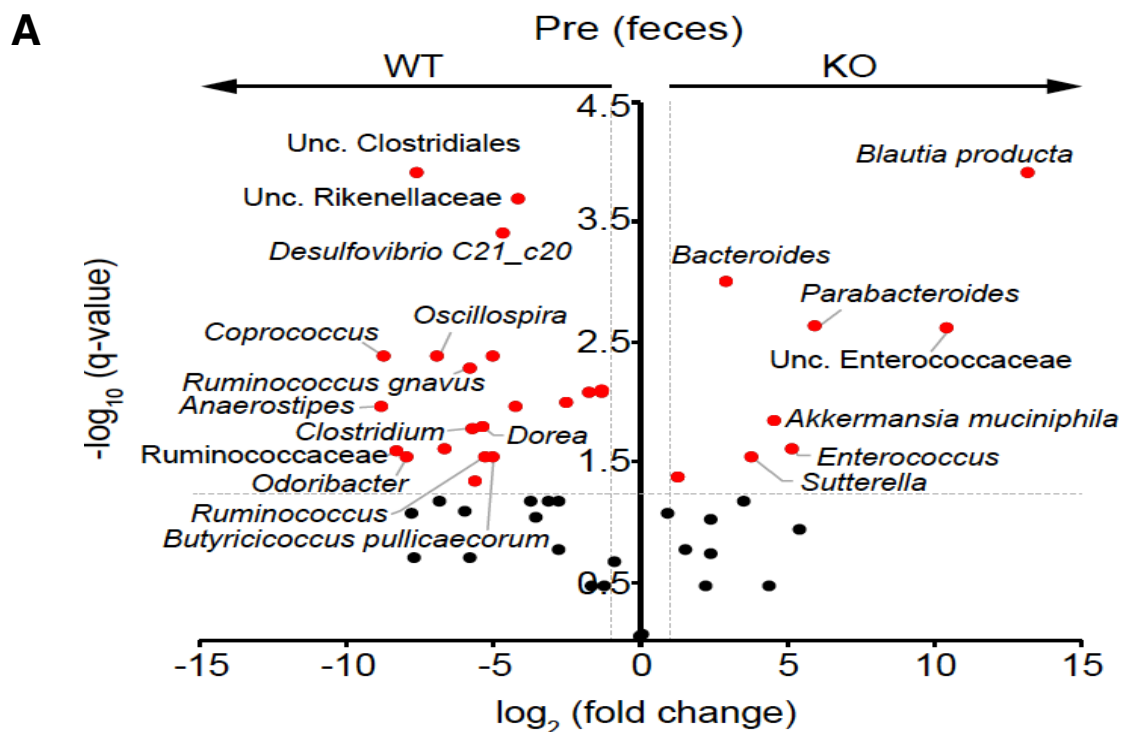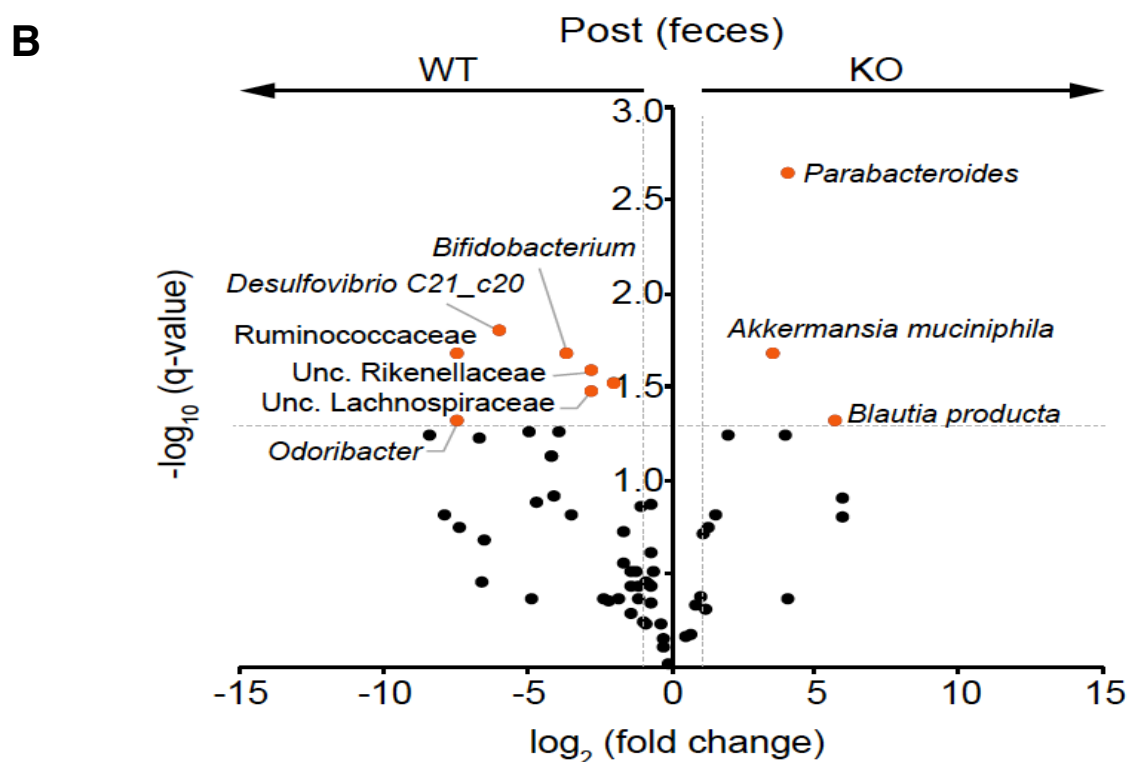

Supplement: NIHMS1646408-supplement-Sup_Fig3.pdf [file NIHMS1646408-supplement-Sup_Fig3.pdf]
